# Supplementary material
Source: PubMed Central journal article supplement (PMC4402269)
Supplement: NIHMS670428-supplement-1.pdf [file NIHMS670428-supplement-1.pdf]

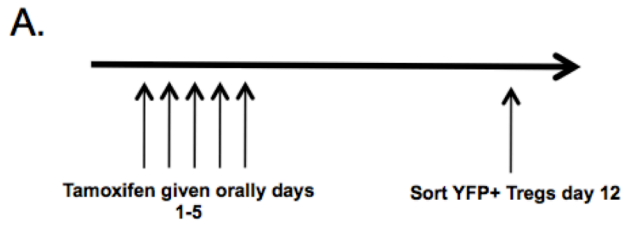

Tamoxifen-induced deletion, cKO:

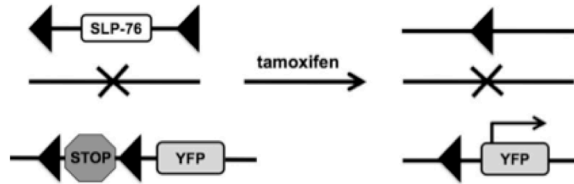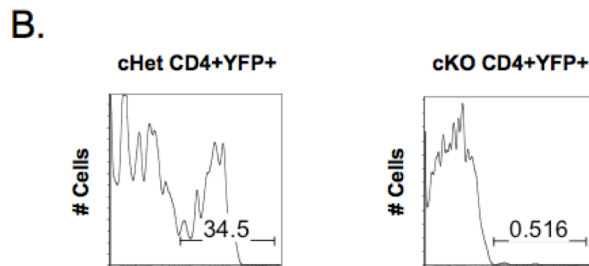

**Supplemental Figure 1. T cells with conditional ablation of SLP-76 do not upregulate CD69 upon TCR stimulation.** (A) SLP-76<sup>F/+</sup> or SLP-76<sup>F/-</sup> mice crossed to ER-Cre and a ROSA26-STOP-flox-YFP reporter were treated with Tamoxifen orally for 5 days followed by a 7 day rest period. YFP<sup>+</sup> Tregs were sorted on Day 12 for suppression experiments. (B) On Day 11, YFP<sup>+</sup> T cells from the peripheral the blood of Tamoxifen-treated mice were stimulated with anti-CD3 for 18 hours and stained for CD69 expression.

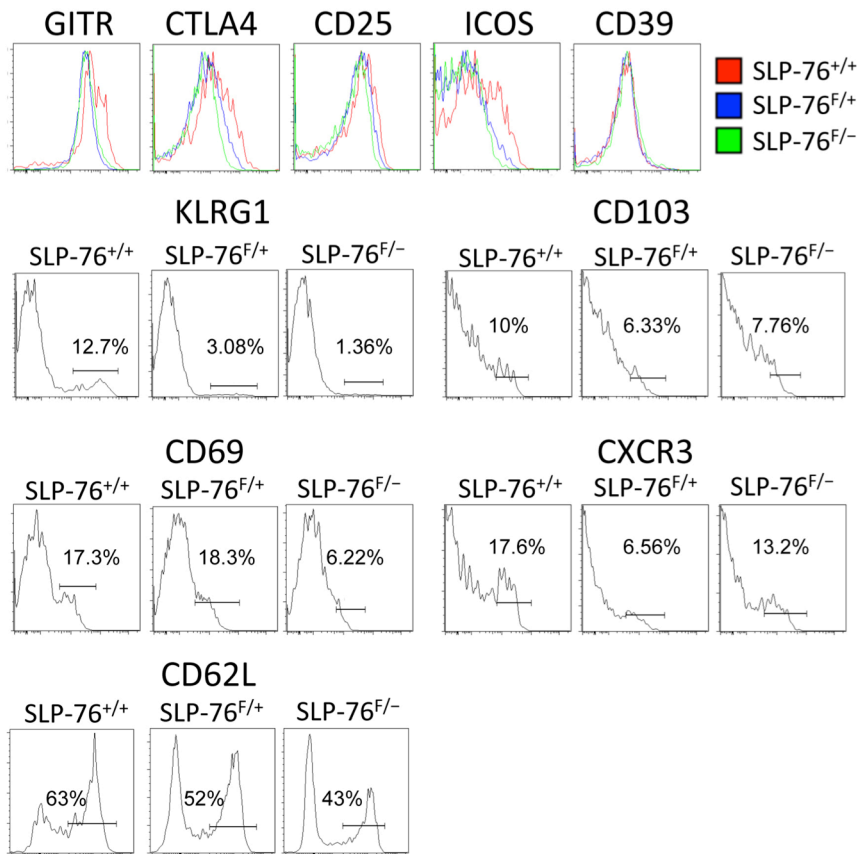

**Supplemental Figure 2. The loss of SLP-76 in Tregs variably changes effector/differentiation marker expression.** SLP-76<sup>+/+</sup>, SLP-76<sup>F/+</sup>, or SLP-76<sup>F/-</sup> mice crossed to ER-Cre and a ROSA26-STOP-flox-YFP reporter were treated with Tamoxifen orally for 5 days followed by a 7 day rest period. On Day 12, the expression of GITR, CTLA4, CD25, ICOS, CD39, KLRG1, CD103, CD69, CXCR3, and CD62L was examined on YFP<sup>+</sup>CD4<sup>+</sup>Foxp3<sup>+</sup> cells as indicated. One representative of two independent experiments is shown.

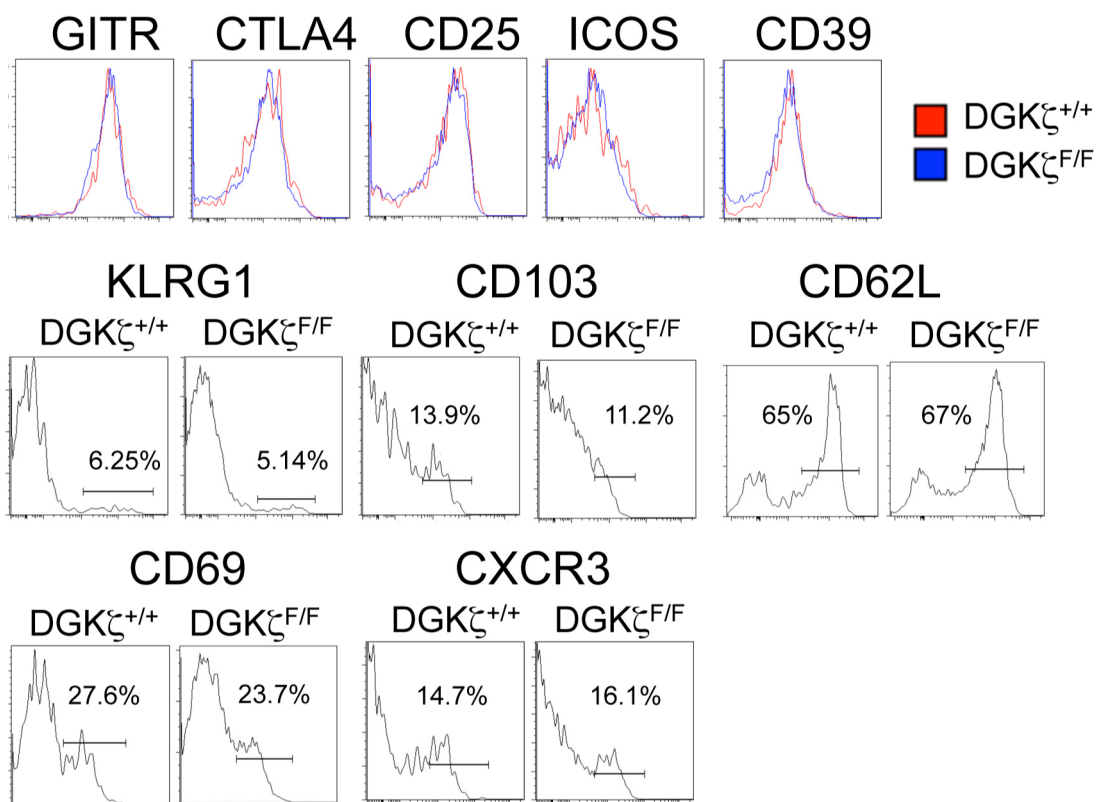

**Supplemental Figure 3. The loss of DGK $\zeta$  in Tregs minimally affects the expression of effector/differentiation markers.** DGK $\zeta$ <sup>+/+</sup> or DGK $\zeta$ <sup>F/F</sup> mice crossed to ER-Cre and a ROSA26-STOP-flox-YFP reporter were treated with Tamoxifen orally for 5 days followed by a 7 day rest period. On Day 12, the expression of GITR, CTLA4, CD25, ICOS, CD39, KLRG1, CD103, CD62L, CD69, and CXCR3 was examined on YFP<sup>+</sup>CD4<sup>+</sup>Foxp3<sup>+</sup> cells as indicated. One representative of two independent experiments is shown.
